# 1 **Title: Optimal Deployment of Automated External Defibrillators in a** 2 **Long and Narrow Environment**

3 Chih-Hao Lin<sup>1</sup>; Kuan-Chao Chu<sup>2</sup>; Jung-Ting Lee<sup>3\*</sup>; Chung-Yao Kao<sup>4</sup>.

4 <sup>1</sup>Department of Emergency Medicine, National Cheng Kung University Hospital, College of Medicine,  
5 National Cheng Kung University, Tainan, Taiwan

6 <sup>2</sup>Graduate School of Information Science and Technology, The University of Tokyo, Tokyo, Japan

7 <sup>3</sup>Si Wan College, National Sun Yat-Sen University, Kaohsiung, Taiwan

8 <sup>4</sup>Department of Electrical Engineering, National Sun Yat-Sen University, Kaohsiung, Taiwan

9

10

11 \*Corresponding author

12 E-mail: celeste@g-mail.nsysu.edu.tw

13

14

15 **Author Contributions:** C.-H. Lin and C.-Y. Kao conceived the study. C.-H. Lin, K.-C. Chu, and C.-Y.  
16 Kao contributed substantially to the study design. C.-H. Lin and C.-Y. Kao obtained the research grant. K.-  
17 C. Chu implemented a software program for validating the proposed optimal AED deployment strategy. J.-  
18 T. Lee provided the graphical illustrations, and drafted the manuscript with C.-Y. Kao. All authors  
19 contributed substantially to its revision and agreed to the published version of the manuscript. J.-T. Lee is  
20 the corresponding author who takes responsibility for the submitted manuscript and coordinating the  
21 publication process.

22

## 23 **Abstract**

24 **Aim of the study:** Public access to automated external defibrillators (AEDs) plays a key role in increasing  
25 survival outcomes for patients with out-of-hospital cardiac arrest. Based on the concept of maximizing  
26 “rescue benefit” of AEDs, we aimed to develop strategies for optimal deployment of AEDs for long and  
27 narrow spaces.

28  
29 **Methods:** We classified the effective coverage of an AED in hot, warm, and cold zones. The AEDs were  
30 categorized, according to their accessibility, as fixed, summonable, or patrolling types. The overall rescue  
31 benefit of the AEDs were evaluated by the weighted size of their collective hot zones. The optimal strategies  
32 for the deployment of AEDs were derived mathematically and numerically verified by computer programs.

33  
34 **Results:** To maximize the overall rescue benefit of the AEDs, the AEDs should avoid overlapping with  
35 each other’s coverage as much as possible. Specific rules for optimally deploying one, two, or multiple  
36 AEDs, and various types of AEDs are summarized and presented.

37  
38 **Conclusion:** A methodology for assessing the rescue benefit of deployed AEDs was proposed, and  
39 deployment strategies for maximizing the rescue benefit of AEDs along a long, narrow, corridor-like, finite  
40 space were derived. The strategies are simple and readily implementable. Our methodology can be easily  
41 generalized to search for optimal deployment of AEDs in planar areas or three-dimensional spaces.

42

## 43 **Introduction**

44 Sudden cardiac arrest is a major public health issue worldwide (1, 2) and accounts for up to 20% of  
45 deaths in Western societies (3, 4). Out-of-hospital cardiac arrest (OHCA) describes an event of cardiac  
46 arrest before the patient is transferred to a hospital; that is, the cardiac arrest could occur in the field, in the  
47 community, at the patient's home or workplace (5, 6). The first and second most common locations for an  
48 OHCA were at a residence and in public, respectively (7). OHCAs are witnessed by a layperson in 37% of  
49 cases and by an emergency medical services (EMS) provider in only 12% of cases (7). The survival rate  
50 after an OHCA is very low; at least 90% to 95% of these individuals do not survive despite resuscitation  
51 attempts (8). Evidence indicates that when the OHCA is caused by ventricular tachycardia or fibrillation,  
52 defibrillation is an effective treatment (9); however, its effectiveness diminishes with each passing minute  
53 (5, 10).

54 Public access to automated external defibrillators (AEDs) plays a key role in increasing the survival of  
55 patients with OHCA who have a shockable cardiac rhythm (11-13). Although AEDs are widespread,  
56 OHCAs defibrillated by bystanders before EMS arrival remains low, only approximately 2-4% (14).  
57 Therefore, to achieve the maximum benefit of public AEDs, careful evaluation of AED locations is required.  
58 While mathematical optimization has been used for assessing optimal locations for the AED deployment  
59 (15-19), most of these studies focus on numerical analysis/simulation of retrospective data. To our  
60 knowledge, few studies, if any, had taken an analytical approach to derive generalizable rules or strategies  
61 for the optimal AED deployment.

62 In this study, we aimed to explore such strategies for a finite one-dimensional space, which is a suitable  
63 model for long strip-like locations, such as trains, platforms in a train station, long tunnels, etc. By using  
64 simplified yet realistic assumptions, we derived simple rules for the optimal AED deployment that would  
65 maximize AED accessibility within a specified time frame.

66

67

68

## 69 **Methods**

70 A location where an AED is placed is deemed "optimal" if the AED can be accessed within a specific  
71 time when OHCA occurs. Two essential factors need to be considered for assessing optimal AED  
72 deployment: time to acquire the AED and the probability of occurrence of OHCAs. The first factor leads  
73 to the notion of effective AED coverage.

### 74 **Effective coverage of an AED**

75 The sooner an AED is applied, the higher the survival chance of the OHCA (5, 10). According to  
76 timeliness of AED availability, the areas surrounding the AED are differentiated into three zones: hot,  
77 cold, and warm.

- 78 • Hot Zone: This is a region where an AED can be acquired to provide the best survival chance.  
79 According to the American Heart Association's suggestion, the AED needs to be applied to  
80 patients with OHCA within one minute (7). An OHCA event is said to be within *the effective*  
81 *coverage* of an AED if it occurs within the hot zone of the AED.
- 82 • Cold Zone: This is a region where it takes longer time to obtain an AED than waiting for the EMS  
83 to arrive. An AED is ineffective in terms of the rescue benefit in its cold zone.
- 84 • Warm Zone: The is a region where an AED can be acquired before the EMS arrives but not within  
85 one minute. An AED provides some but not the best rescue in its warm zone.

86 For example, in our city, the EMS arrives at an OHCA event in eight minutes on average. Therefore,  
87 we set the cold zone to be where the time of AED arrival is more than eight minutes, and the warm zone  
88 is between one and eight minutes.

89 We assume that the AED moves with constant speed through the areas of interest. Thus, the *distance*  
90 between the AED and the OHCA event would decide the rescue benefit of the AED. The three zones  
91 surrounding the AED are then characterized by physical *distance* rather than *time*, as described above.

92 When more than one AED is under consideration, the combined hot zone of the collective AEDs is  
93 the *union* of the hot zones of each individual AED because it is evident that at least one AED can be  
94 acquired within 1 minute for the patient with OHCA in this region. Similarly, the combined cold zone

95 of the collective AEDs is the *intersection* of all cold zones, as none of the AEDs can be acquired within  
96 8 minutes of time in this region. Everywhere else is the combined warm zone, where none of the AEDs  
97 can be acquired within 1 minute, but at least one can be acquired between 1 and 8 minutes.

## 98 **Probability of OHCA occurrence**

99 Intuitively, the larger the hot zone of an AED is, the more rescue benefit it provides. However, this  
100 is not entirely true. Evidently, an AED would provide no benefit if OHCA events never occur in its hot  
101 and warm zones. Furthermore, an AED would provide more benefit than another if more OHCA events  
102 occur in its hot zone. Thus, the "probability of OHCA occurrence per unit area" in hot/warm/cold zones  
103 of an AED needs to be considered when evaluating its rescue benefit. This quantity shall be used as a  
104 weight that indicates the relative importance of different areas surrounding an AED. The probability  
105 density of OHCA events in an area may vary with respect to, for example, population density, age  
106 distribution, history of heart disease, etc. (12).

## 107 **Evaluation of rescue benefit of AEDs**

108 In this study, the rescue benefit of one or several AEDs is measured by the "weighted" sizes of the  
109 corresponding hot zone, cold zone, and warm zone. Let the area of interest be divided into standard unit  
110 areas, and let

- 111 –  $A_h^i, i = 1 \cdots n_h$  denotes the area units that constitute the hot zone;
- 112 –  $A_c^i, i = 1 \cdots n_c$ , denotes the area units that constitute the cold zone;
- 113 –  $A_w^i, i = 1 \cdots n_w$  denotes the area units that constitute the warm zone;
- 114 –  $t_w^i, i = 1 \cdots n_w$  denotes the least amount of time (round up to the minute) for one AED to be acquired  
115 by an OHCA patient in the area unit  $A_w^i$ ;
- 116 –  $dA$  denotes the size of the unit area;
- 117 –  $p_{OHCA}(\cdot)$  denotes the probability density function of OHCA events over the area of interest.

118 Then, the weighted sizes of the hot zone, cold zone, and warm zone, denoted by  $A_H, A_C, A_W$ , respectively,  
119 are computed as follows:

$$A_H = \sum_{i=1}^{n_h} p_{OHCA}(A_h^i) \times dA$$

$$A_C = \sum_{i=1}^{n_c} p_{OHCA}(A_c^i) \times dA$$

$$A_W = \sum_{i=1}^{n_w} \frac{1}{t_w^i} \times p_{OHCA}(A_w^i) \times dA$$

The rescue benefits of two sets of AEDs are assessed and compared by the following rules: one set of AEDs ( $S_{AED1}$ ) has a better rescue benefit than another set ( $S_{AED2}$ )

1. if the weighted size of the hot zone  $A_H$  of  $S_{AED1}$  is *larger than* that of  $S_{AED2}$ ; or
2. if their respective  $A_H$  are the same and the weighed size of the cold zone  $A_C$  of  $S_{AED1}$  is *smaller than* that of  $S_{AED2}$ ; or
3. if their respective  $A_H$  and  $A_C$  are both the same and the weighed size of the warm zone  $A_W$  of  $S_{AED1}$  is *larger than* that of  $S_{AED2}$ .

Should the two sets of AEDs have the same  $A_H$ ,  $A_C$ , and  $A_W$ , then their rescue benefits are regarded the same.

### Setup for the optimal AED deployment problem under consideration

In this study, we aimed to find a strategy for optimally deploying one or multiple AEDs along a long and narrow space, which can be mathematically modeled as a finite one-dimensional line segment. Such a model is suitable for real-life public spaces such as trains, platforms in train stations, tunnels, etc. The following assumptions are made:

**Assumption 1.** The geometric conditions of the space under consideration are uniform, and the AEDs can be transported along the space at a constant speed.

**Assumption 2.** The probabilities for an OHCA event to occur at any two points in the space under consideration are identical.

The first assumption allows the hot, cold, and warm zones of an AED to be characterized by the distance to the AED, which, although simplifying, is reasonable when the space under consideration is

143 of small to moderate size. The second assumption is reasonable when the space under consideration is  
144 public, and there is no reason to expect that a particular population with high OHCA risks would be  
145 present at specific locations. Note that by the second assumption, the “weighted sizes” of the hot and  
146 cold zones become the “actual sizes”, and the size of the warm zone becomes only inversely time-scaled.  
147 As an illustration, consider the spaces depicted in Fig. 1, where we assume it takes one minute to move  
148 through one unit area. Comparing the weighted sizes of the hot, cold, and warm zones, the two AEDs in  
149 Fig. 1A have the same rescue benefit, while the two sets of AEDs in Fig. 1B do not.

150 According to their accessibility, we consider three types of AEDs: fixed, summonable, and patrolling  
151 (subsequently denoted by F-type, S-type, and P-type, respectively).

- 152 • A fixed AED is an AED placed in a fixed location.
- 153 • A summonable AED is an AED placed in a location with a person on call to deliver the AED when  
154 receiving requests. We assume that the time delay between the occurrence of an OHCA and a  
155 summonable AED responding to the event is negligible.
- 156 • A patrolling AED is an AED carried by a person moving over a designated area periodically, who  
157 can deliver the AED when receiving requests.

158 Examples of summonable AEDs and patrolling AEDs are not uncommon. AEDs in the dining car of a  
159 train where someone can respond to a call to deliver the AEDs are summonable. AEDs carried by a  
160 person, such as a conductor or a service attendant walking through a train, become patrolling. The  
161 accessibility of these three types of AEDs drastically changes their corresponding  $A_H$ ,  $A_C$ , and  $A_W$ .  
162 Clearly, the  $A_H$  and  $A_W$  of a summonable AED are twice as large as those of a fixed AED. This is because  
163 a summonable AED is delivered on call, and therefore, the time for retrieving a summonable AED is  
164 half as much as that of a fixed AED at the same location. For a patrolling AED, the corresponding  $A_H$ ,  
165  $A_C$ , and  $A_W$  are evaluated as the average of those corresponding to a summonable AED placed in every  
166 area in the region it patrols. See Fig. 2 for an illustration of the hot, cold, and warm zones of these three  
167 types of AEDs.

168 Rules for optimally deploying the AEDs are given in the next section. The rules were derived

169 mathematically and numerically verified by computer programs. The numerical verification is  
170 performed based on dividing the one-dimensional space of interest into a collection of finite unit areas  
171 and searching through all possible deployments to determine the optimal deployments, which are  
172 determined by comparing the rescue benefits as discussed previously. To accommodate the numerical  
173 computation and all practical purposes regarding the applications we have in mind, we consider up to  
174 five AEDs in our numerical verifications, with only one patrolling AED. We assume that the patrolling  
175 AED moves through the whole space.

## 177 Results

178 The rules for optimally deploying the AEDs are presented here. The rules are given for one, two, and  
179 multiple (up to five) AEDs of the three types discussed in the previous section.

### 180 Optimal deployment strategy for one AED

181 Given a finite one-dimensional space, a fixed AED would provide the best rescue benefit if its hot  
182 and warm zones are fully contained in the space, as this would result in its cold zone being minimized.  
183 Furthermore, two fixed AEDs would have the same rescue benefit if their respective hot zones and warm  
184 zones are fully contained in the space. Finally, as illustrated in Fig. 2C, placing a fixed AED toward  
185 either side of the finite space may result in parts of its hot and warm zones falling outside the space and  
186 thus enlarging the cold zone. Following these arguments, the optimal AED location is in *the center* of  
187 the space. The worst AED locations are the two end points. The same arguments are also applied to a  
188 summonable AED.

189 Moreover, as the  $A_H$  and  $A_W$  of a summonable AED are twice as large as those of a fixed AED and  
190 placing an AED at the end of the space would reduce its  $A_H$  and  $A_W$  by half, one concludes that placing  
191 a summonable AED at the worst location would still have the same rescue benefit as a fixed AED at its  
192 optimal location. Therefore, the benefit of a summonable AED is always larger than or equal to that of  
193 a fixed AED.

194 For AED patrolling throughout the whole space, its instantaneous benefit decreases as it moves toward



195 the end point. Since the effective  $A_H$  and  $A_W$  of a patrolling AED is calculated in the averaged sense, as  
196 illustrated in Fig. 2B, the benefit of a patrolling AED is between the best and the worst rescue benefit  
197 that a summonable AED can provide.

### 198 **Optimal deployment strategy for two AEDs.**

199 When there are two AEDs, the benefit is maximized if the hot and warm zones of one AED do not  
200 intersect with their counterparts of the other AED; as in this case, the combined hot zone is maximized  
201 and the combined cold zone is minimized. Because placing an AED toward the "center" is potentially  
202 better, an optimal deployment strategy for two non-patrolling AEDs can be derived as follows: divide  
203 the whole space into two segments according to the ratio of the weighted sizes of the individual hot  
204 zones and place the AEDs at the respective centers of these segments. In the case of two fixed AEDs or  
205 two summonable AEDs, the space is to be divided into two equal segments. In the case of one fixed  
206 AED and one summonable AED, the space is divided into two segments, of which the ratio of the lengths  
207 is 1-to-2. See Fig. 3A for an illustration.

208 When one of the AEDs is patrolling throughout the space, the optimal location to place the non-  
209 patrolling AED is somewhat different from the "centering" strategy. The optimal location for placing  
210 the non-patrolling AED is near one of the end points of the space. Specifically, the fixed or summonable  
211 AED should be placed as close to the end point as possible, such that its hot zone is entirely within the  
212 space with its edge coinciding with the edge of the space. See Fig. 3B for an illustration.

### 213 **Optimal deployment strategy for multiple (three or more) AEDs.**

214 The idea developed in the previous sections can be generalized for optimal deployment of three or  
215 more AEDs. The general rules are given as follows.

- 216 • (Rule NP) In the case of no patrolling AED, the total space is divided into the sum of  $n_F$  shorter  
217 equal-length segments and  $n_S$  longer equal-length segments, with the length ratio of the longer to  
218 shorter segments being 2-to-1, where  $n_F$  and  $n_S$  are the numbers of fixed AEDs and summonable  
219 AEDs, respectively. Then, the fixed AEDs are placed at the center of the shorter segments, while  
220 the summonable AEDs are at the center of the longer segments. See Fig. 4 for an illustration.

221 • (Rule WP) In the case of AEDs patrolling throughout the space, first choose two AEDs with the  
 222 smallest individual hot zone and place them near the two ends of the space, such that the hot zones  
 223 are entirely within the space and the edges of their hot zones coincide with the edges of the space.  
 224 Then, follow Rule NP to place the remaining AEDs in the space excluding the two hot zones. Fig.  
 225 5 illustrates the idea.

226 The optimality of these rules is verified numerically by computer programs for instances  $(n_F, n_S) = (2, 1)$ ,  
 227  $(1, 2)$ , and  $(2, 2)$ , with or without a patrolling AED.

228 The rules are summarized in Table 1.

229 **Table 1. Summary of the optimal deployment of one, two, and three or more AEDs in a one-**  
 230 **dimensional space.**

231

| Number of AEDs | Type of AED                           | Deployment Rule for Maximizing Rescue Benefit                                                                                                                                                                                                                                                                                                            |
|----------------|---------------------------------------|----------------------------------------------------------------------------------------------------------------------------------------------------------------------------------------------------------------------------------------------------------------------------------------------------------------------------------------------------------|
| one            | F-type                                | Place the AED at the center of the finite space.                                                                                                                                                                                                                                                                                                         |
|                | S-type                                | Place the AED at the center of the finite space.                                                                                                                                                                                                                                                                                                         |
|                | P-type                                | The AED constantly patrols the whole space.                                                                                                                                                                                                                                                                                                              |
| two            | F-type + F-type or<br>S-type + S-type | Divide the finite space into two equal segments, and place one AED at the center of each segment, respectively.                                                                                                                                                                                                                                          |
|                | F-type + S-type                       | Divide the finite space into two segments by length ratio 1-to-2 and place the F-type AED at the center of the shorter segment, and the S-type AED at the center of the longer segment.                                                                                                                                                                  |
|                | F-type + P-type or<br>S-type + P-type | Place the F-type or the S-type AED at one end of the space so that the edge of its hot zone coincides with the edge of the space. The P-type AED constantly patrols the whole space.                                                                                                                                                                     |
|                | P-type + P-type                       | The AEDs constantly patrol the whole space                                                                                                                                                                                                                                                                                                               |
| three or more  | F-type and/or S-type, no P-type       | Divide the finite space into $n_F$ shorter segments plus $n_S$ longer segments, where $n_F$ is the number of F-type AEDs and $n_S$ is the number of S-type AEDs. The length ratio between the shorter and longer segments is 1-to-2. Then, place one F-type AED at the center of the shorter segment and one S-type AED at the center of longer segment. |

|  |                                                                |                                                                                                                                                                                                                                                                                                                         |
|--|----------------------------------------------------------------|-------------------------------------------------------------------------------------------------------------------------------------------------------------------------------------------------------------------------------------------------------------------------------------------------------------------------|
|  | at least one P-type, together with either F-type and/or S-type | The P-type AED(s) constantly patrols the whole space. At each end of the space, place one F-type or S-type AED so that the edge of its hot zone coincides with the edge of the space. Finally, deploy the remaining F-type and S-type AEDs to the space excluding the two hot zones according to the rule stated above. |
|--|----------------------------------------------------------------|-------------------------------------------------------------------------------------------------------------------------------------------------------------------------------------------------------------------------------------------------------------------------------------------------------------------------|

232

## 233 Discussion

234 Given several AEDs, to maximize the overall rescue benefit of these AEDs, evaluated by the weighted  
235 size of their collective hot zones, one should deploy the AEDs such that the hot zone of one AED avoids  
236 overlapping with those of the other AEDs as much as possible. This is the central principle behind all the  
237 rules presented in the previous section. Note that the rules we presented are not the only way to maximize  
238 the rescue benefit, but they are simple and easy to implement.

239 The results we derived are typically applicable to public spaces such as trains and tunnels. They are also  
240 applicable to tall buildings when the vertical coverage of AEDs across stories is concerned. In such  
241 scenarios, a tall building can be effectively viewed as a finite one-dimensional space.

242 Our results were derived under the assumption that the geometric conditions of the space under  
243 consideration are uniform, that the patrolling AEDs periodically travel the whole space with constant speed,  
244 and they are transported along the space with a constant speed. We also assumed that the probabilities for  
245 an OHCA event to occur at any point in the space are identical. These simplifying assumptions, which are  
246 realistic to some applications as explained, allowed us to mathematically derive simple rules for optimal  
247 deployment. In cases where these assumptions do not hold, the methodology we proposed is still applicable  
248 as long as relevant parameters are known for evaluating the weighted sizes of hot, cold, and warm zones of  
249 the AEDs. The corresponding optimal deployment problem can still be solved numerically by well-  
250 developed algorithms (20). Moreover, the methodology we proposed can be straightforwardly generalized  
251 to accommodate two-dimensional problems, which are relevant to, for example, deployment of AEDs  
252 across a metropolitan region, and three-dimensional problems, which are relevant to, for example,  
253 deployment of AEDs in a commercial district with many skyscrapers where the vertical coverage of AEDs

254 is essential.

255

## 256 **Conclusions**

257 A methodology for assessing the rescue benefit of deployed AEDs was proposed, and deployment  
258 strategies for maximizing the rescue benefit of the AEDs along a long and narrow space were derived. The  
259 strategies are simple and readily implementable. Our methodology can easily be generalized to search for  
260 optimal deployment of AEDs in planar areas or three-dimensional spaces.

261

## 262 **Acknowledgements**

263 This study was funded by the Taiwan Ministry of Science and Technology (Grant numbers: MOST 105-  
264 2314-B-006-069, MOST 106-2314-B-006-003, MOST 107-2314-B-006-003, and MOST 109-2221-E-110-  
265 031).

266

## 267 References

- 268 1. Kobayashi D, Sado J, Kiyohara K, Kitamura T, Kiguchi T, Nishiyama C, et al. Public location and  
269 survival from out-of-hospital cardiac arrest in the public-access defibrillation era in Japan. *Journal of*  
270 *cardiology*. 2020;75(1):97-104.
- 271 2. Wong CX, Brown A, Lau DH, Chugh SS, Albert CM, Kalman JM, et al. Epidemiology of sudden  
272 cardiac death: global and regional perspectives. *Heart, Lung and Circulation*. 2019;28(1):6-14.
- 273 3. Lopshire JC, Zipes DP. Sudden cardiac death: better understanding of risks, mechanisms, and  
274 treatment. *Am Heart Assoc*; 2006.
- 275 4. Paratz ED, Rowsell L, Zentner D, Parsons S, Morgan N, Thompson T, et al. Cardiac arrest and  
276 sudden cardiac death registries: a systematic review of global coverage. *Open heart*. 2020;7(1).
- 277 5. Lin C-H, Ng YY, Chiang W-C, Karim SA, Do Shin S, Tanaka H, et al. Variation of current protocols  
278 for managing out-of-hospital cardiac arrest in prehospital settings among Asian countries. *Journal of the*  
279 *Formosan Medical Association*. 2016;115(8):628-38.
- 280 6. Nichol G, Thomas E, Callaway CW, Hedges J, Powell JL, Aufderheide TP, et al. Regional variation  
281 in out-of-hospital cardiac arrest incidence and outcome. *Jama*. 2008;300(12):1423-31.
- 282 7. Benjamin EJ, Blaha MJ, Chiuve SE, Cushman M, Das SR, Deo R, et al. Heart disease and stroke  
283 statistics—2017 update: a report from the American Heart Association. *circulation*. 2017;135(10):e146-  
284 e603.
- 285 8. Fishman GI, Chugh SS, DiMarco JP, Albert CM, Anderson ME, Bonow RO, et al. Sudden cardiac  
286 death prediction and prevention: report from a National Heart, Lung, and Blood Institute and Heart  
287 Rhythm Society Workshop. *Circulation*. 2010;122(22):2335-48.
- 288 9. Weisfeldt ML, Sitlani CM, Ornato JP, Rea T, Aufderheide TP, Davis D, et al. Survival after  
289 application of automatic external defibrillators before arrival of the emergency medical system:  
290 evaluation in the resuscitation outcomes consortium population of 21 million. *Journal of the American*  
291 *College of Cardiology*. 2010;55(16):1713-20.
- 292 10. Hallstrom AP, Ornato JP, Weisfeldt M, Travers A, Christenson J, McBurnie MA, et al. Public-access  
293 defibrillation and survival after out-of-hospital cardiac arrest. *N Engl J Med*. 2004;351(7):637-46.
- 294 11. Culley LL, Rea TD, Murray JA, Welles B, Fahrenbruch CE, Olsufka M, et al. Public access  
295 defibrillation in out-of-hospital cardiac arrest: a community-based study. *Circulation*.  
296 2004;109(15):1859-63.
- 297 12. Murakami Y, Iwami T, Kitamura T, Nishiyama C, Nishiuchi T, Hayashi Y, et al. Outcomes of  
298 out-of-hospital cardiac arrest by public location in the public-access defibrillation era. *Journal of the*  
299 *American Heart Association*. 2014;3(2):e000533.
- 300 13. Nakashima T, Noguchi T, Tahara Y, Nishimura K, Yasuda S, Onozuka D, et al. Public-access  
301 defibrillation and neurological outcomes in patients with out-of-hospital cardiac arrest in Japan: a  
302 population-based cohort study. *The Lancet*. 2019;394(10216):2255-62.
- 303 14. Sondergaard KB, Hansen SM, Pallisgaard JL, Gerds TA, Wissenberg M, Karlsson L, et al. Out-of-

- 304 hospital cardiac arrest: Probability of bystander defibrillation relative to distance to nearest automated  
305 external defibrillator. *Resuscitation*. 2018;124:138-44.
- 306 15. Chan TC, Li H, Lebovic G, Tang SK, Chan JY, Cheng HC, et al. Identifying locations for public access  
307 defibrillators using mathematical optimization. *Circulation*. 2013;127(17):1801-9.
- 308 16. Huang C-Y, Wen T-H. Optimal installation locations for automated external defibrillators in Taipei  
309 7-Eleven stores: using GIS and a genetic algorithm with a new stirring operator. *Computational and*  
310 *mathematical methods in medicine*. 2014;2014.
- 311 17. Siddiq AA, Brooks SC, Chan TC. Modeling the impact of public access defibrillator range on public  
312 location cardiac arrest coverage. *Resuscitation*. 2013;84(7):904-9.
- 313 18. Srinivasan S, Salerno J, Hajari H, Weiss LS, Salcido DD. Modeling a novel hypothetical use of  
314 postal collection boxes as automated external defibrillator access points. *Resuscitation*. 2017;120:26-30.
- 315 19. Tierney NJ, Reinhold HJ, Mira A, Weiser M, Burkart R, Benvenuti C, et al. Novel relocation  
316 methods for automatic external defibrillator improve out-of-hospital cardiac arrest coverage under  
317 limited resources. *Resuscitation*. 2018;125:83-9.
- 318 20. Lee C-T, Lee Y-C, Chen AY. In-building automated external defibrillator location planning and  
319 assessment through building information models. *Automation in Construction*. 2019;106:102883.
- 320

Figure 1

(Fig. 1A)

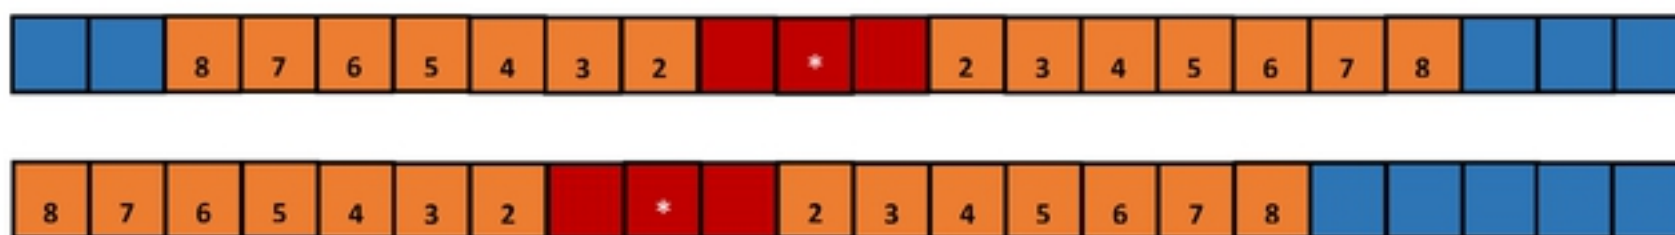

(Fig. 1B)

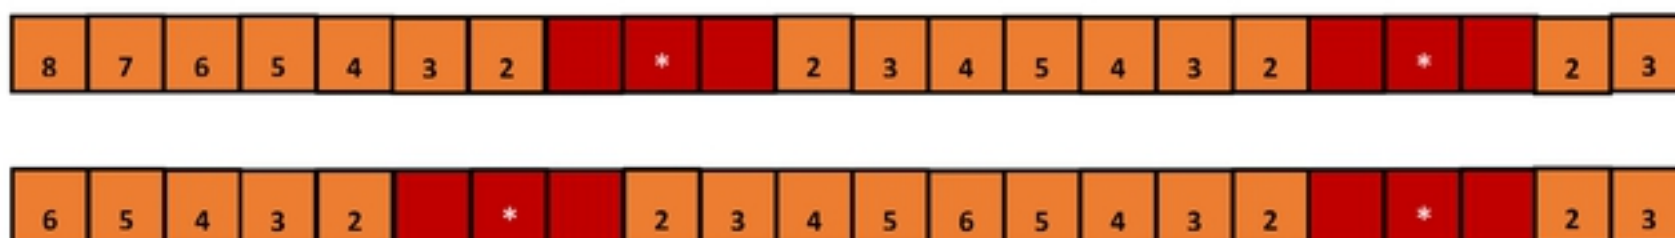

Figure 1: Illustration of weighted sizes of the hot, warm, and cold zones of one AED and two AEDs. (Fig. 1A, top) An AED is placed at the 11<sup>th</sup> square from the left. The hot, warm, and cold zones are colored red, orange, and blue, respectively. For this example, the weighted sizes are  $A_H = 3$ ,  $A_C = 5$ , and  $A_W = 2 \left( \frac{1}{2} + \frac{1}{3} + \dots + \frac{1}{8} \right) = \frac{481}{140}$ .

(Fig. 1A, bottom) If we place the AED at the 9<sup>th</sup> square, the weighted sizes of hot, warm, and cold zones remain the same. The rescue benefit of this location is the same as that of the previous one.

(Fig. 1B, top) An AED is placed at the 9<sup>th</sup> square from the left, and another AED is placed at the 4<sup>th</sup> square from the right. The hot and warm zones are colored red and orange, respectively. For this example, there is no cold zone, and the weighted sizes of the hot and warm zones are  $A_H = 6$  and  $A_W = \frac{4131}{840}$ .

(Fig. 1B, bottom) If we move the left AED to the 7<sup>th</sup> square, the weighted sizes of hot and warm zones become different, with  $A_H = 6$  and  $A_W = \frac{4439}{840}$ . Therefore, moving the AEDs to the 7<sup>th</sup> square results in a better rescue benefit.

Figure 2

(Fig. 2A)

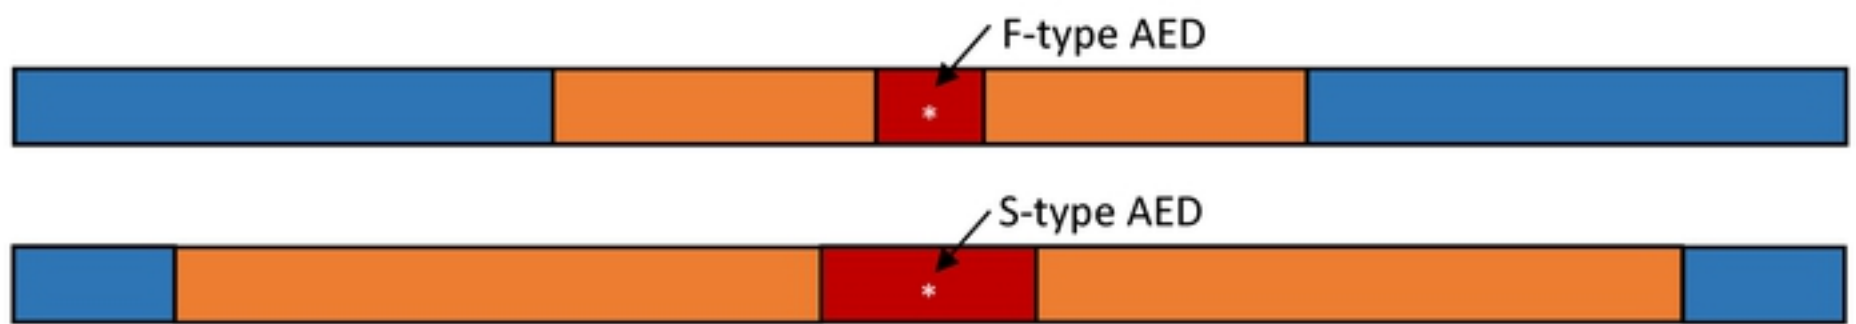

(Fig. 2B)

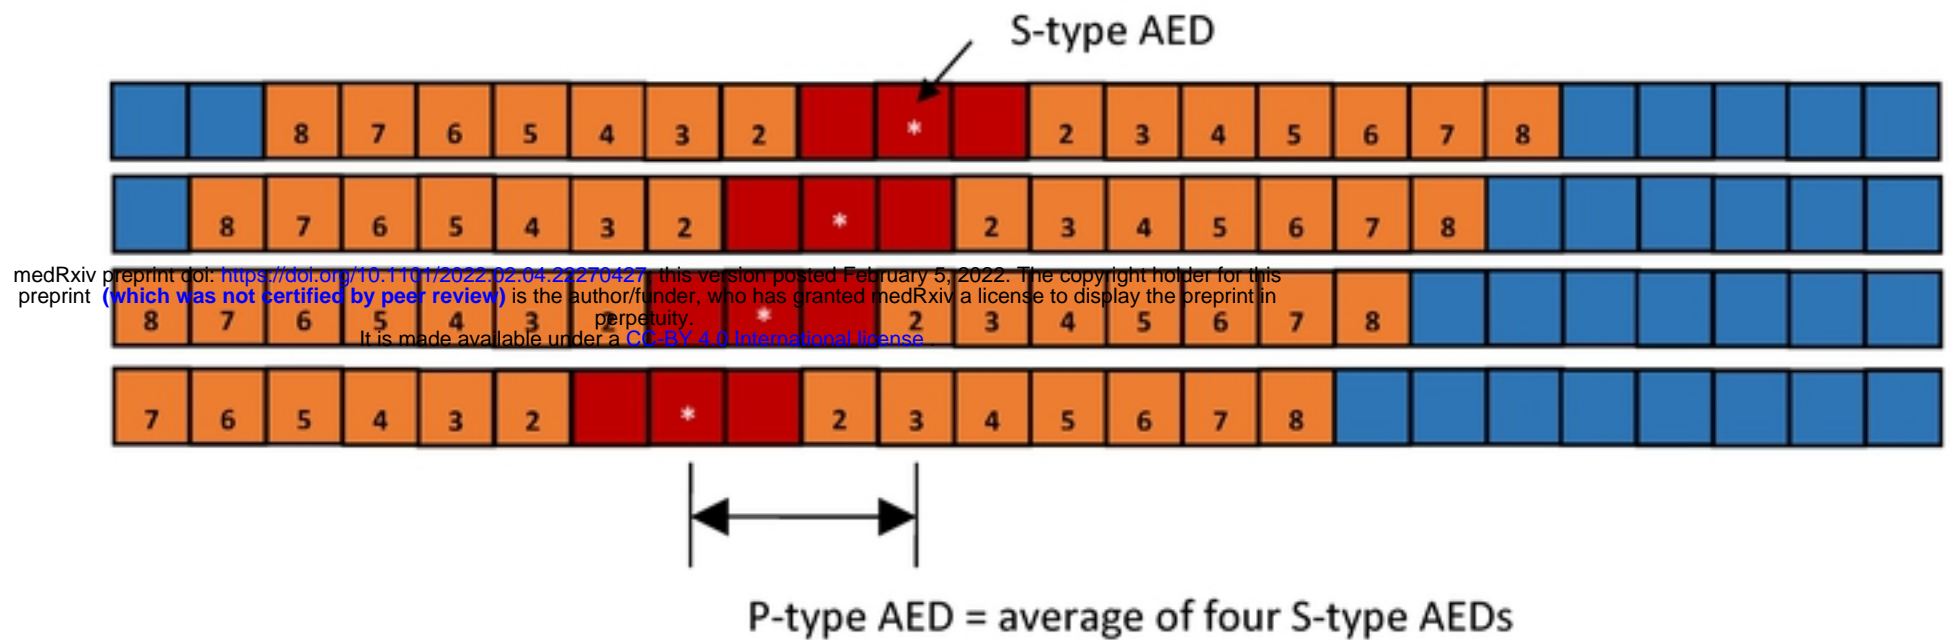

(Fig. 2C)

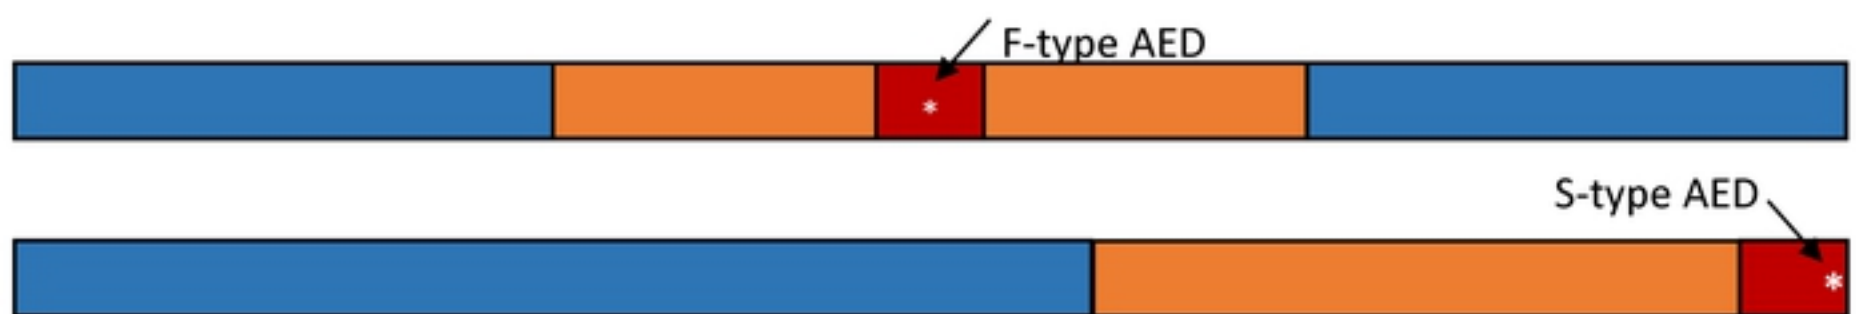

Figure 2: Illustration of the three types of AEDs: fixed, summonable, and patrolling.

(Fig. 2A) The hot, warm, and cold zones of fixed (F-type) AEDs and summonable (S-type) AEDs. The weighted sizes of the hot and warm zones ( $A_H$  and  $A_W$ , respectively) of an S-type AED are twice as large as their counterparts of an F-type AED. As such, the cold zone of an S-type AED is smaller than that of an F-type AED in the same confined space.

(Fig. 2B) The weighted sizes of the hot, warm, and cold zones of a patrolling (P-type) AED. Assume that the P-type AED is patrolling between the 8<sup>th</sup> and 11<sup>th</sup> (from the left) squares. The weighted sizes  $A_H$ ,  $A_C$ , and  $A_W$  of this P-type AED are the averages of those corresponding to the four S-type AEDs placed at the 8<sup>th</sup> to 11<sup>th</sup> squares, respectively.

(Fig. 2C) The  $A_H$  and  $A_W$  of an S-type AED are twice as large as those of an F-type AED. Thus, even when an S-type AED is placed at the least optimal position where its  $A_H$  and  $A_W$  are halved, the rescue benefit it provides is still the same as that of an F-type AED placed at the optimal position.



Figure 3

(Fig. 3A)

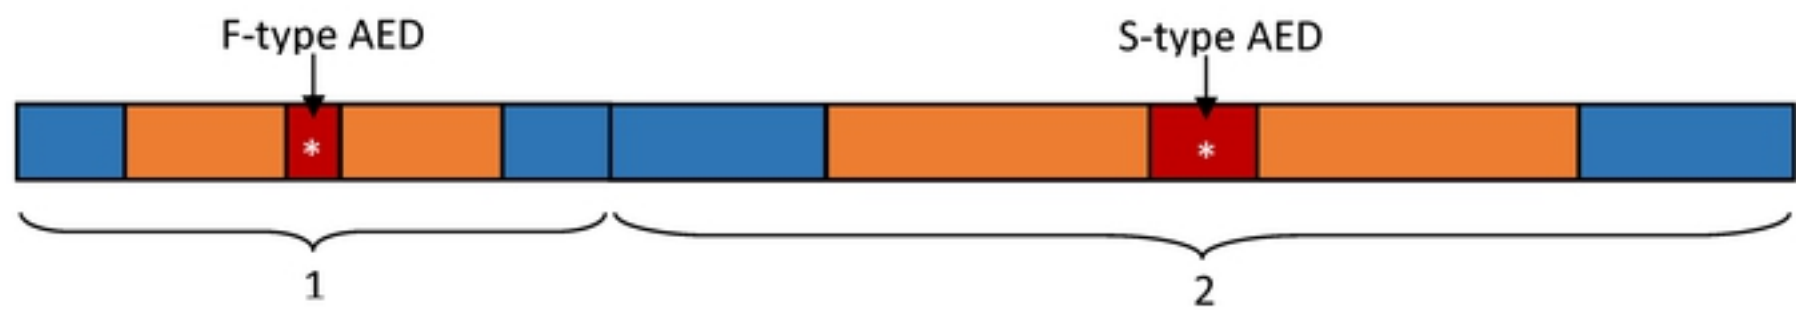

(Fig. 3B)

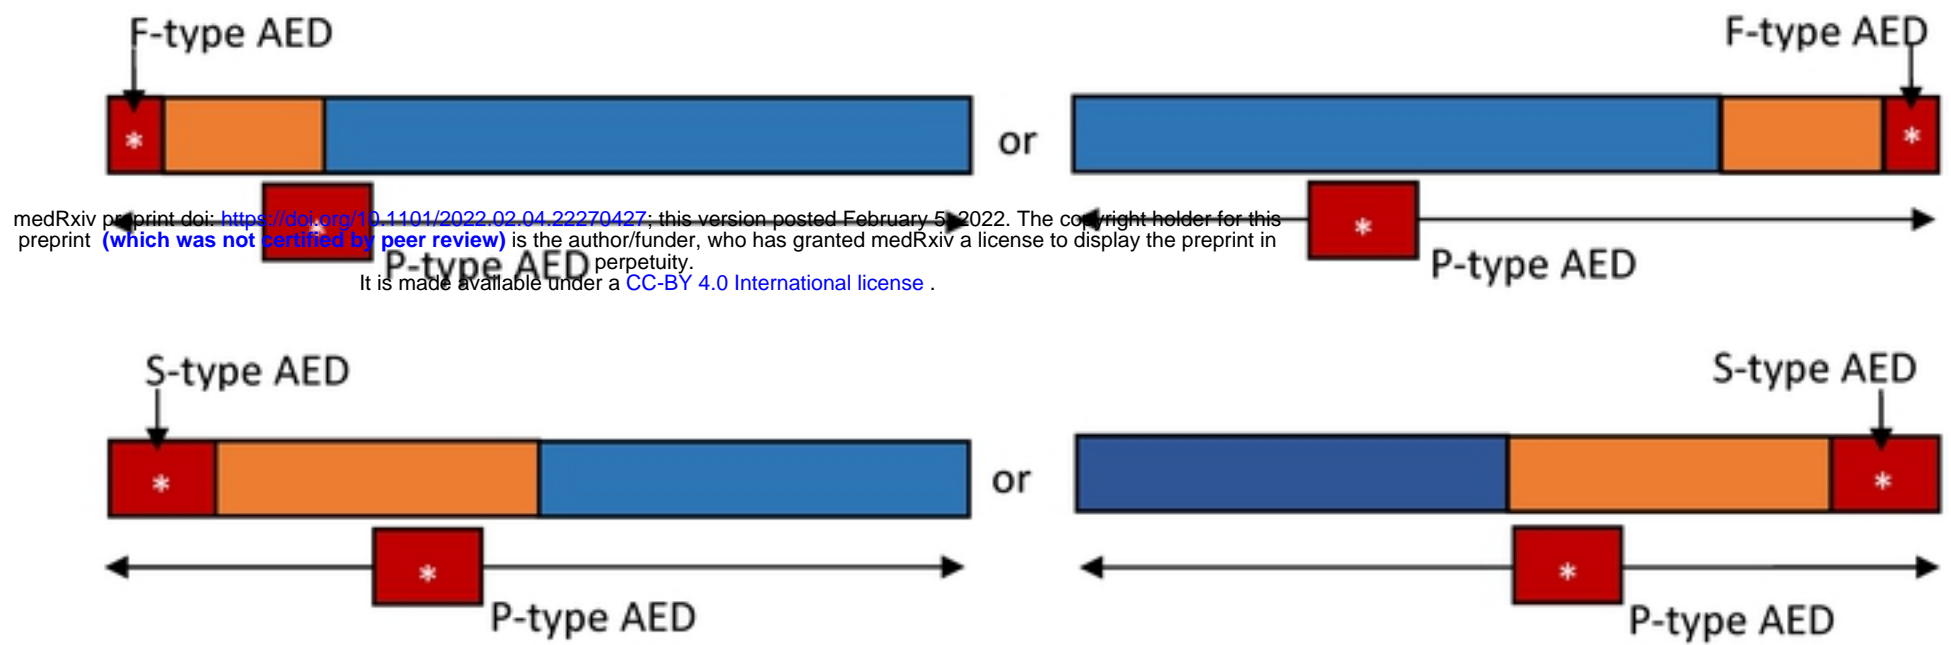

Figure 3: Illustration of the optimal deployment for two AEDs.

(Fig. 3A) One F-type and one S-type AED. In this case, one should divide the confined space into two parts with a 1-to-2 length ratio. The F-type AED is placed at the center of the shorter part, and the S-type AED is placed at the center of the longer part.

(Fig. 3B) One P-type AED and one F-type or S-type AED. In this case, the F-type or S-type AED is placed toward one of the end locations with its hot zone entirely contained in the confined space. The P-type AED patrols the entire space.

Figure 4

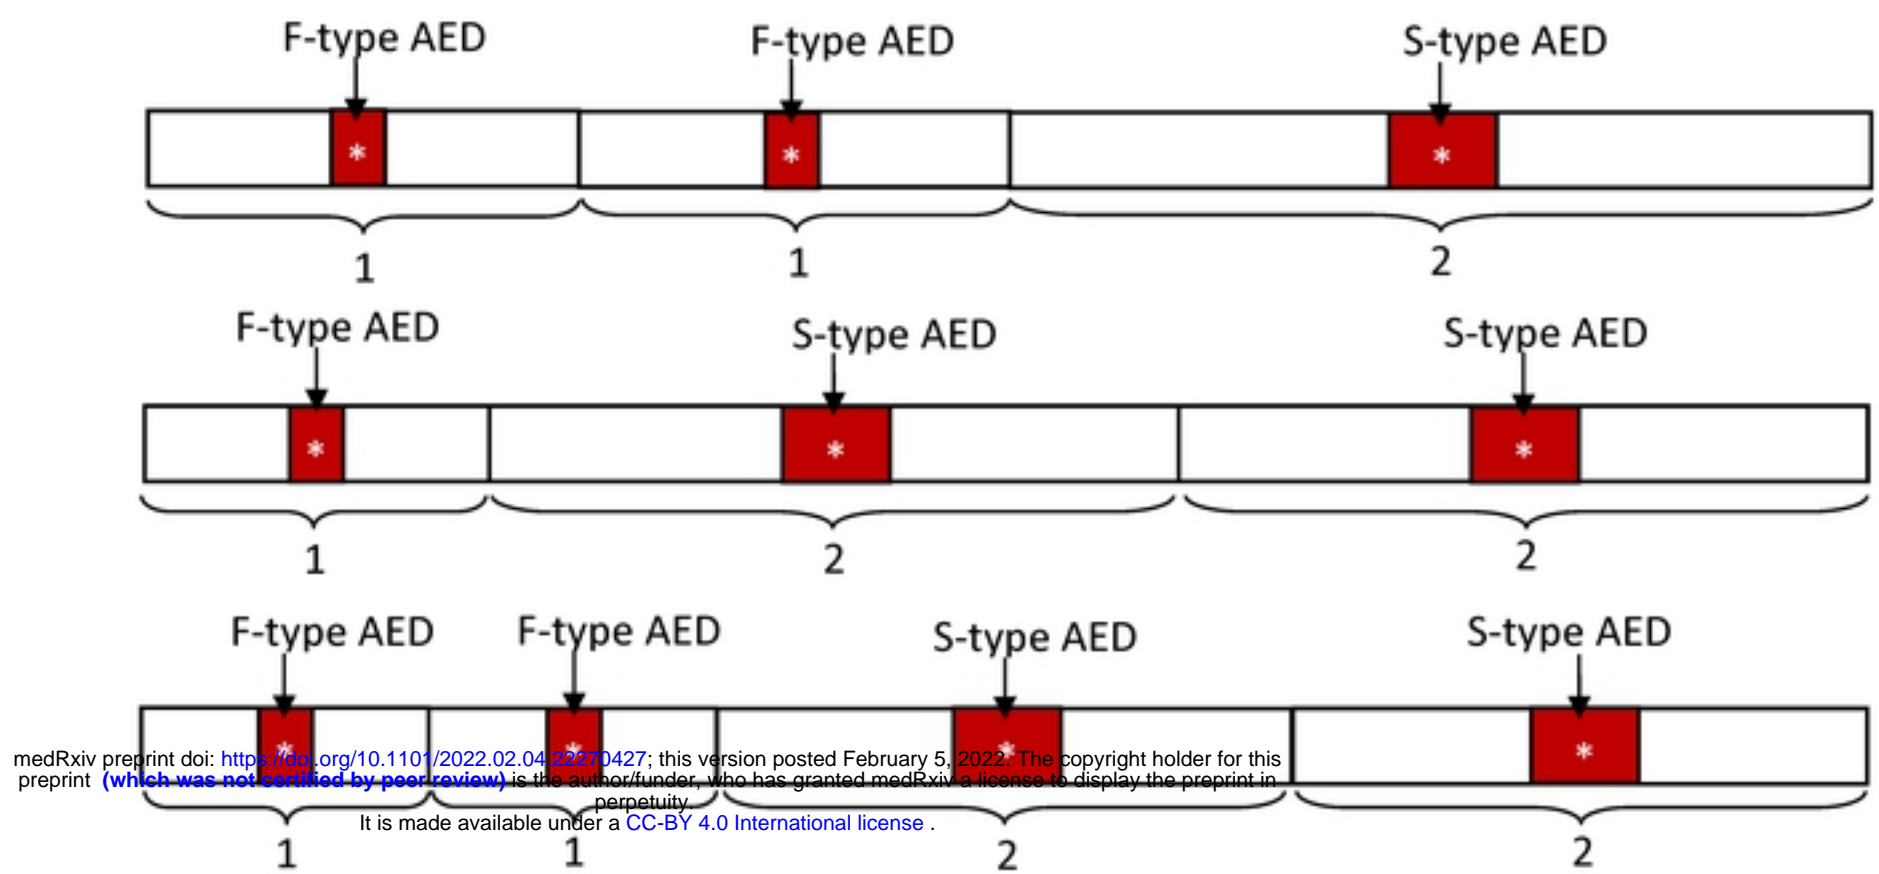

Figure 4: Illustration of optimal deployment for multiple AEDs.

$n_F$  F-type AEDs and  $n_S$  S-type AEDs, where  $(n_F, n_S) = (2, 1)$ ,  $(1, 2)$ , and  $(2, 2)$ . Here we only indicate the hot zones of each AEDs. In the case of  $(n_F, n_S) = (2, 1)$ , the confined space is divided into three parts with a 1-to-1-to-2 length ratio. The F-type AEDs are placed at the centers of the shorter parts, and S-type AEDs are the longer parts. Similarly, in the case of  $(n_F, n_S) = (1, 2)$ , the confined space is divided into three parts with a 1-to-2-to-2 length ratio. In the case of  $(n_F, n_S) = (2, 2)$ , four parts are needed with a length ratio of 1-to-1-to-2-to-2.

Figure 5

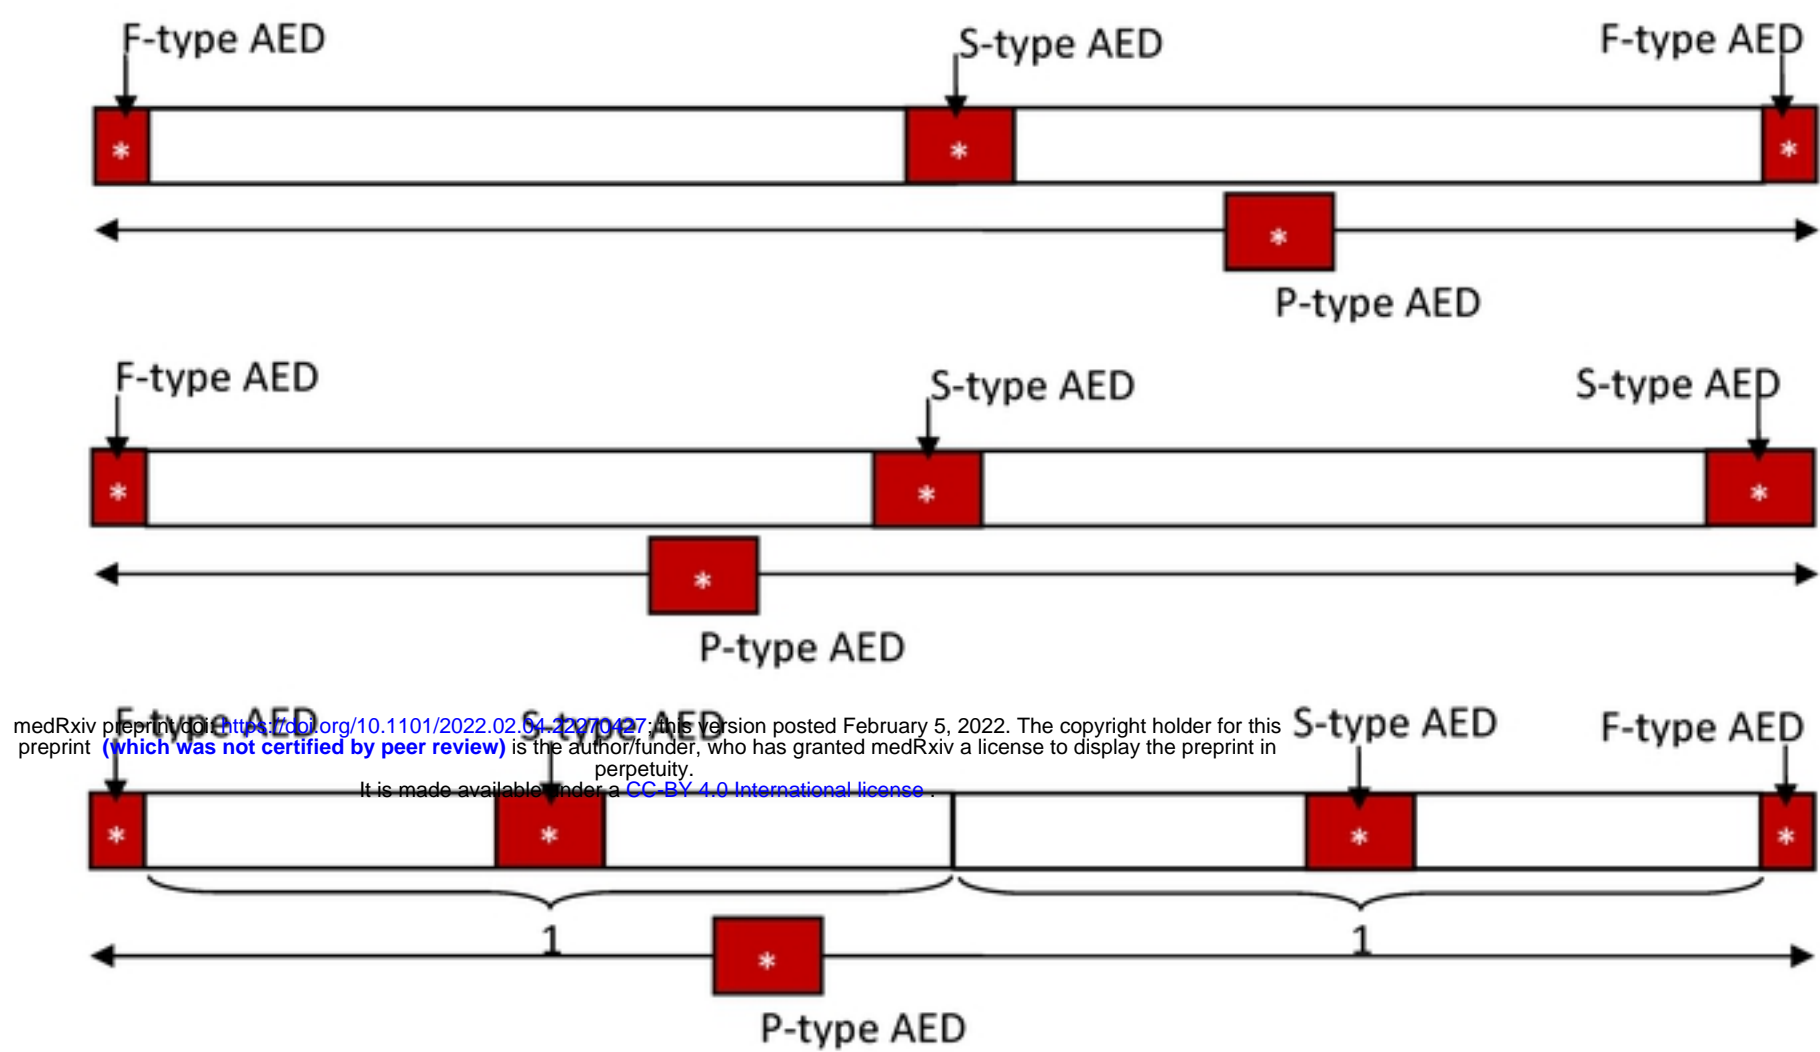

Figure 5: Illustration of optimal deployment for multiple AEDs.

$n_F$  F-type AEDs and  $n_S$  S-type AEDs with one patrolling (P-type) AED, where  $(n_F, n_S) = (2, 1)$ ,  $(1, 2)$ , and  $(2, 2)$ . Again, here, we only indicate the hot zones of each AED. With a P-type AED, we need to place two AEDs toward the two end locations with their hot zones entirely contained in the confined space. In the case of  $(n_F, n_S) = (2, 1)$ , the two F-type AEDs are placed toward the end locations, and the S-type AED is placed at the center of the remaining space. In the case of  $(n_F, n_S) = (1, 2)$ , we place one F-type AED and one S-type AED toward the end locations and one S-type AED at the center of the remaining space. In the case of  $(n_F, n_S) = (2, 2)$ , again, we place two F-type AEDs toward the end locations. The remaining space is then divided into two parts with a 1-to-1 length ratio. The two S-type AEDs are then placed at the center of these two parts.
